# Supplementary material
Source: PubMed Central journal article supplement (PMC2970864)
Supplement: supp_182_7_937__1.pdf [file supp_182_7_937__1.pdf]

**Perfusion scintigraphy and patient selection for lung volume reduction surgery**

*Divay Chandra, MD MSc, David A Lipson, MD, Eric A Hoffman, PhD, John Hansen-Flaschen, MD*

*Frank C Sciurba, MD, Malcom M DeCamp, MD, John J Reilly, MD, and George R Washko, MD, for the NETT*

*Research Group*

**Online data supplement**

Major enrollment criteria were:

1. Bilateral emphysema with  $FEV_1 \leq 45\%$  predicted
2. Total lung capacity  $\geq 100\%$  predicted
3. Residual volume  $\geq 150\%$  predicted
4.  $PaCO_2 \leq 60$  mm Hg ( $PaCO_2 \leq 55$  mm Hg in Denver, CO).

## Supplementary figures

**Figure E1.** Kaplan-Meier survival curves after randomization for patients with non-upper lobe predominant emphysema ( $n = 357$ ). Among those with low exercise capacity (panel A1) mortality was similar with LVRS or optimal medical management (RR = 0.78,  $p = 0.18$ ). This did not change after classifying patients as having low or high upper-zone perfusion (panel A2, RR = 0.88,  $p = 0.38$ , and panel A3, RR = 0.76,  $p = 0.21$ , respectively). Among those with high exercise capacity (panel B1) survival was also similar with LVRS and optimal medical management (RR = 1.2,  $p = 0.20$ ). This did not change after classifying patients as having low or high upper-zone perfusion (panel B2, RR = 1.8,  $p = 0.33$ , and panel B3, RR = 1.1,  $p = 0.35$ , respectively).

**Figure E2.** A comparison of frequency of improvement in functional outcomes after randomization to lung volume reduction surgery (LVRS, black bars) vs. optimal medical treatment (OMT, grey bars) for patients with non-upper lobe predominant emphysema and low exercise capacity at baseline. Outcomes were mostly better with LVRS though these improvements did not persist till 3 years after randomization (column C1). This remained true after patients were classified as having low (column C2) or high upper-zone perfusion (column C3). The sample size was smaller in the low compared to the high perfusion group (39 vs. 100) which likely resulted in the non-significant  $p$ -values at 1 year follow-up in those with low perfusion.

**Figure E3.** A comparison of frequency of improvement in functional outcomes after randomization to lung volume reduction surgery (LVRS, black bars) vs. optimal medical treatment (OMT, grey bars) for patients with non-upper lobe predominant emphysema and high exercise capacity at baseline. Outcomes were mostly better with LVRS though improvements did not persist 3 years after randomization (column D1). This remained true after patients were classified as having low (column D2) or high upper-zone perfusion (column D3). The sample size was smaller in the low compared to the high perfusion group (34 vs. 96) which likely resulted in the non-significant  $p$ -values at 1 year follow-up in those with low perfusion.

**Figure E4.** A comparison of different cutoffs for defining low vs. high upper-zone perfusion. 20% appeared to be the best cut-off because the odds ratio started to approach one when the cutoff was increased or decreased

from 20%. The cutoff of 20% also resulted in the narrowest confidence interval for the odds ratio. Note: x-axis is not to scale.

**Figure E1.**

**A1. Non-upper lobe predominance, low exercise capacity (n = 145)**

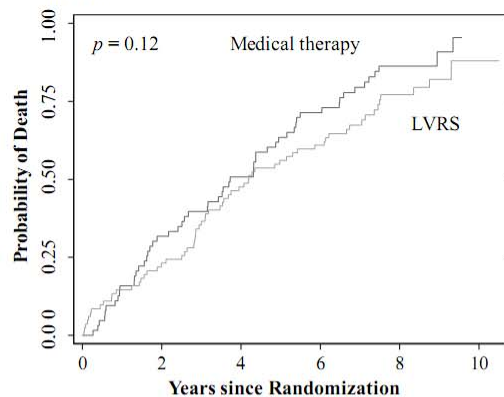

No. at risk

|                 |    |    |    |    |    |   |
|-----------------|----|----|----|----|----|---|
| Surgery         | 82 | 64 | 44 | 33 | 12 | 2 |
| Medical therapy | 63 | 44 | 32 | 19 | 7  | 1 |

**A2. Non-upper lobe predominance, low exercise capacity, and low upper zone perfusion (n = 36)**

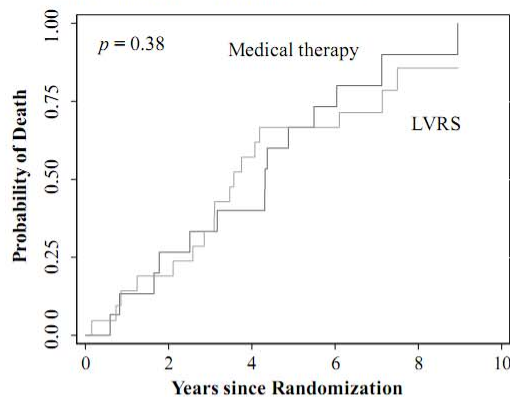

No. at risk

|                 |    |    |    |   |   |   |
|-----------------|----|----|----|---|---|---|
| Surgery         | 21 | 18 | 10 | 8 | 3 | 1 |
| Medical therapy | 15 | 12 | 10 | 5 | 2 | 1 |

**A3. Non-upper lobe predominance, low exercise capacity, and high upper zone perfusion (n = 109)**

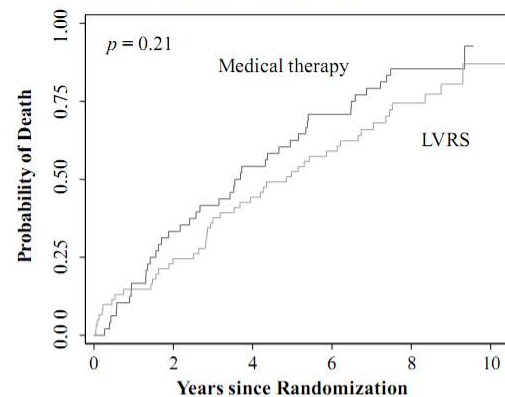

No. at risk

|                 |    |    |    |    |    |   |
|-----------------|----|----|----|----|----|---|
| Surgery         | 61 | 47 | 35 | 26 | 10 | 1 |
| Medical therapy | 48 | 33 | 23 | 15 | 6  | 1 |

**B1. Non-upper lobe predominance, high exercise capacity (n = 212)**

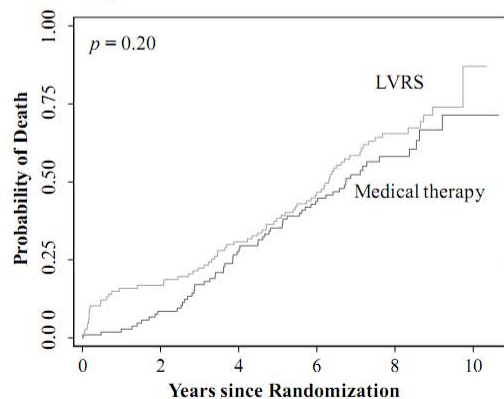

No. at risk

|                 |     |    |    |    |    |   |
|-----------------|-----|----|----|----|----|---|
| Surgery         | 107 | 90 | 75 | 59 | 23 | 2 |
| Medical therapy | 105 | 97 | 77 | 60 | 23 | 4 |

**B2. Non-upper lobe predominance, high exercise capacity, and low upper zone perfusion (n = 39)**

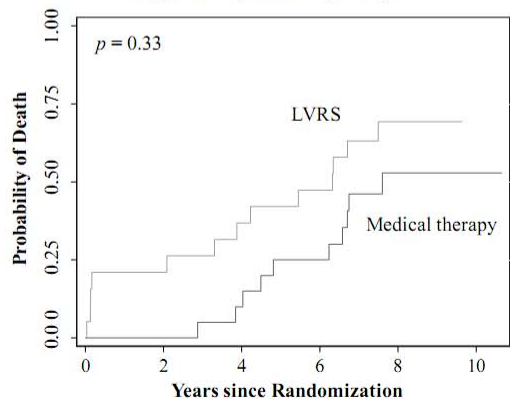

No. at risk

|                 |    |    |    |    |   |   |
|-----------------|----|----|----|----|---|---|
| Surgery         | 19 | 16 | 13 | 11 | 5 | 1 |
| Medical therapy | 20 | 19 | 19 | 16 | 7 | 3 |

**B3. Non-upper lobe predominance, high exercise capacity, and high upper zone perfusion (n = 173)**

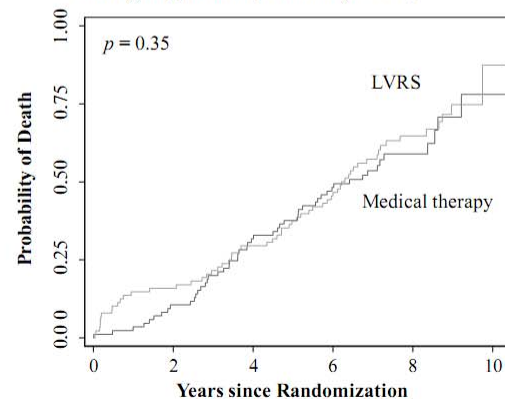

No. at risk

|                 |    |    |    |    |    |   |
|-----------------|----|----|----|----|----|---|
| Surgery         | 88 | 75 | 63 | 49 | 19 | 2 |
| Medical therapy | 85 | 77 | 59 | 45 | 17 | 2 |

**Figure E2.**

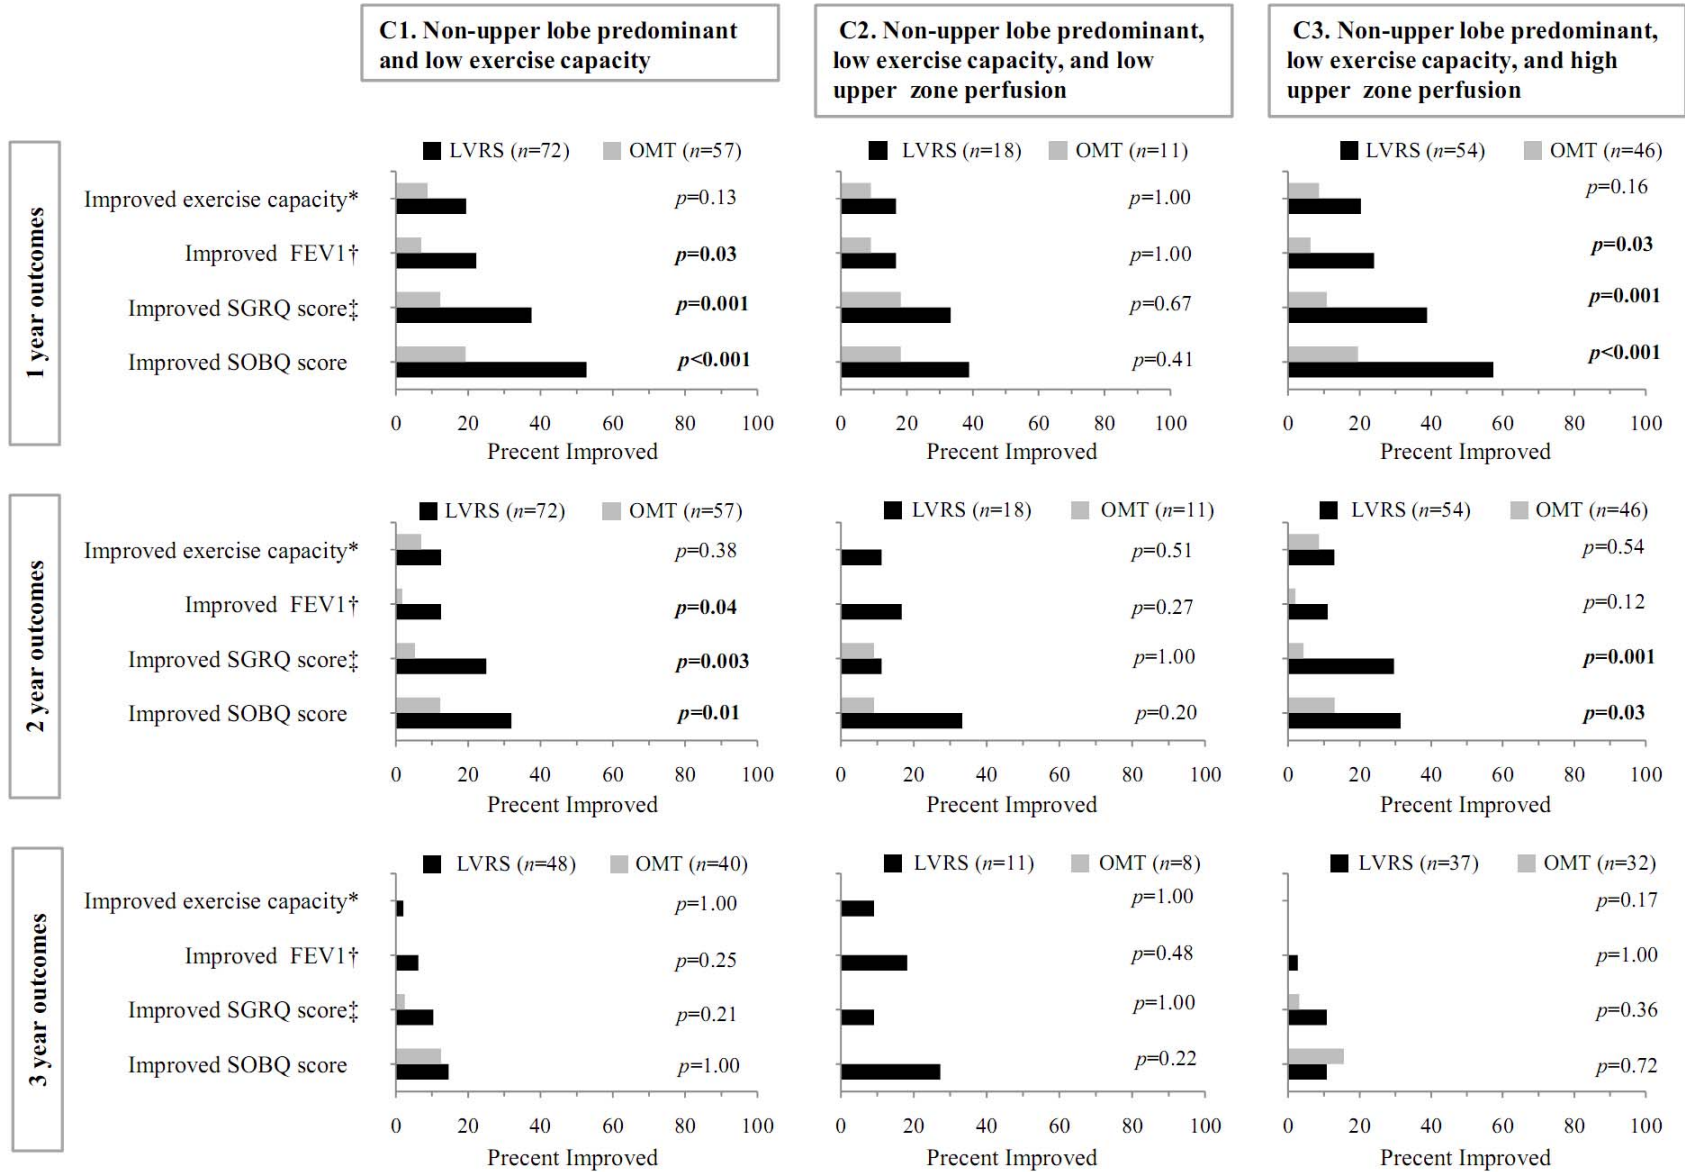

\*  $\geq 10$  Watt improvement in exercise capacity; †  $\geq 100$  mL improvement in FEV<sub>1</sub>; ‡  $\geq 8$  point improvement in total SGRQ score; §  $\geq 5$  point improvement in SOBQ score from baseline.

1 **Figure E3.**

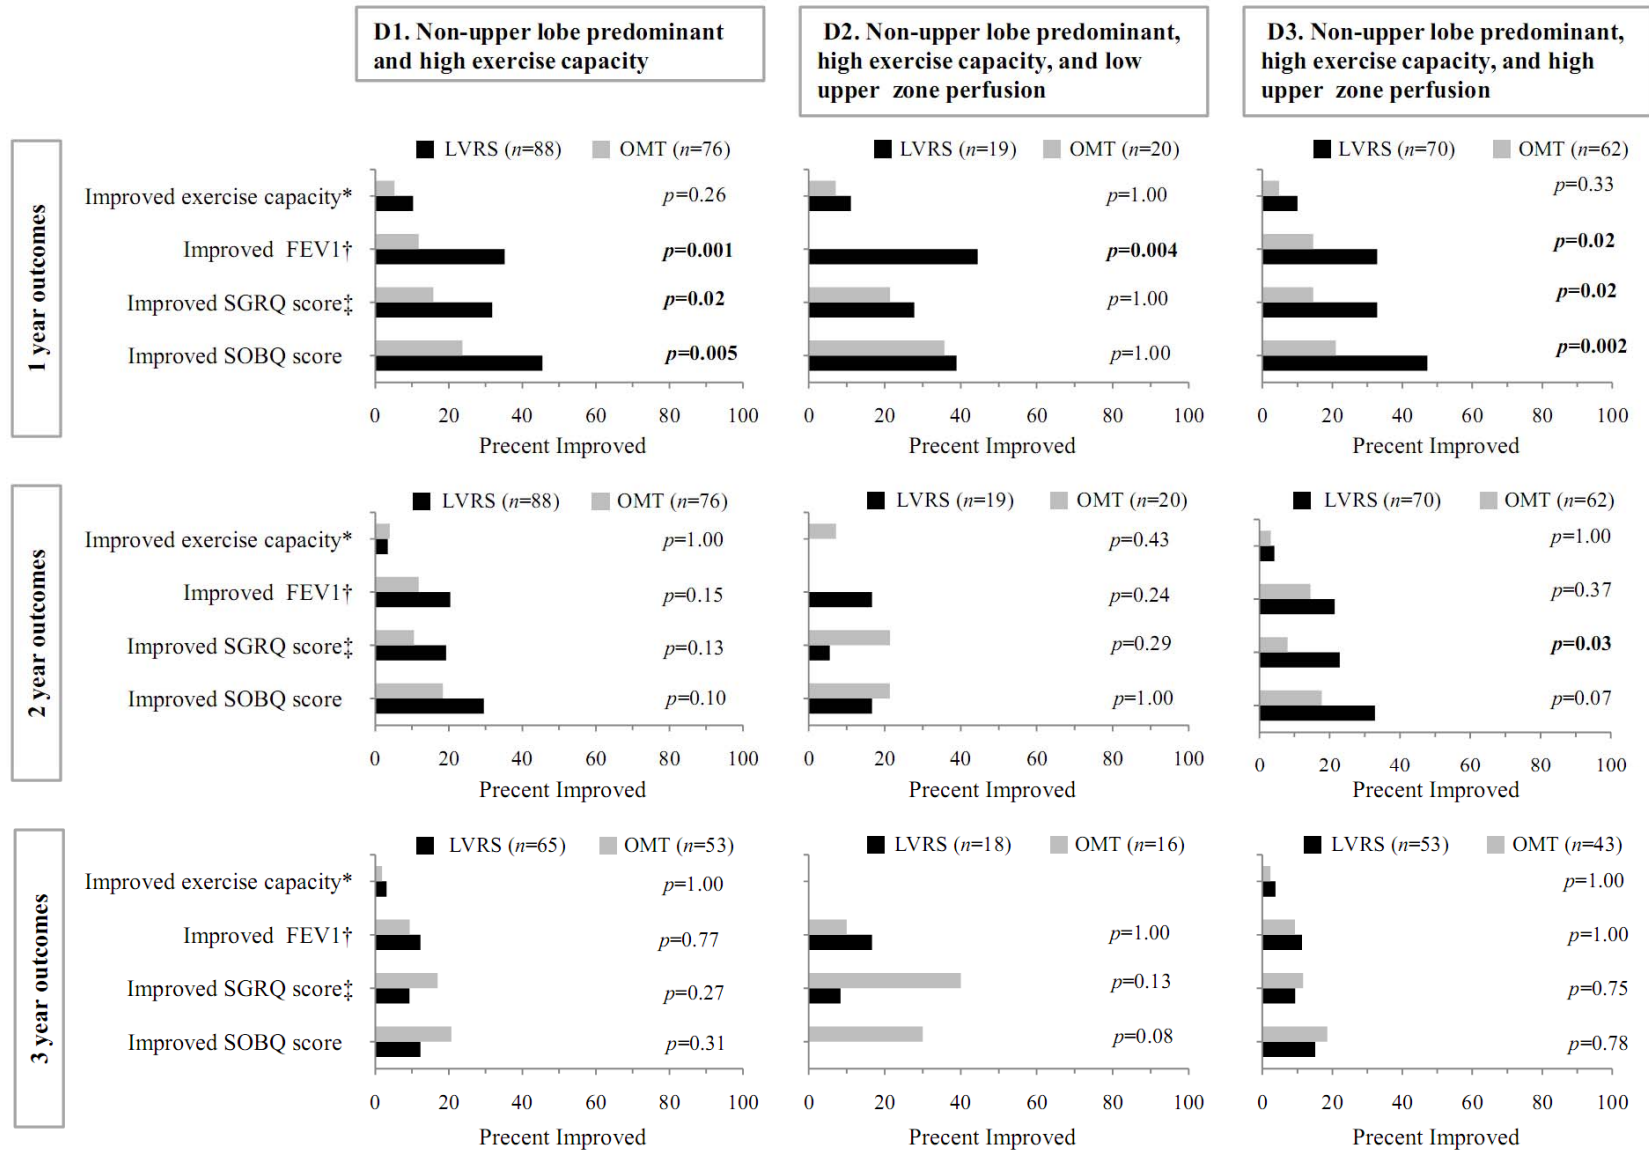

2

\*  $\geq 10$  Watt improvement in exercise capacity; †  $\geq 100$  mL improvement in FEV<sub>1</sub>; ‡  $\geq 8$  point improvement in total SGRQ score; §  $\geq 5$  point improvement in SOBQ score from baseline.

1 **Figure E4.**

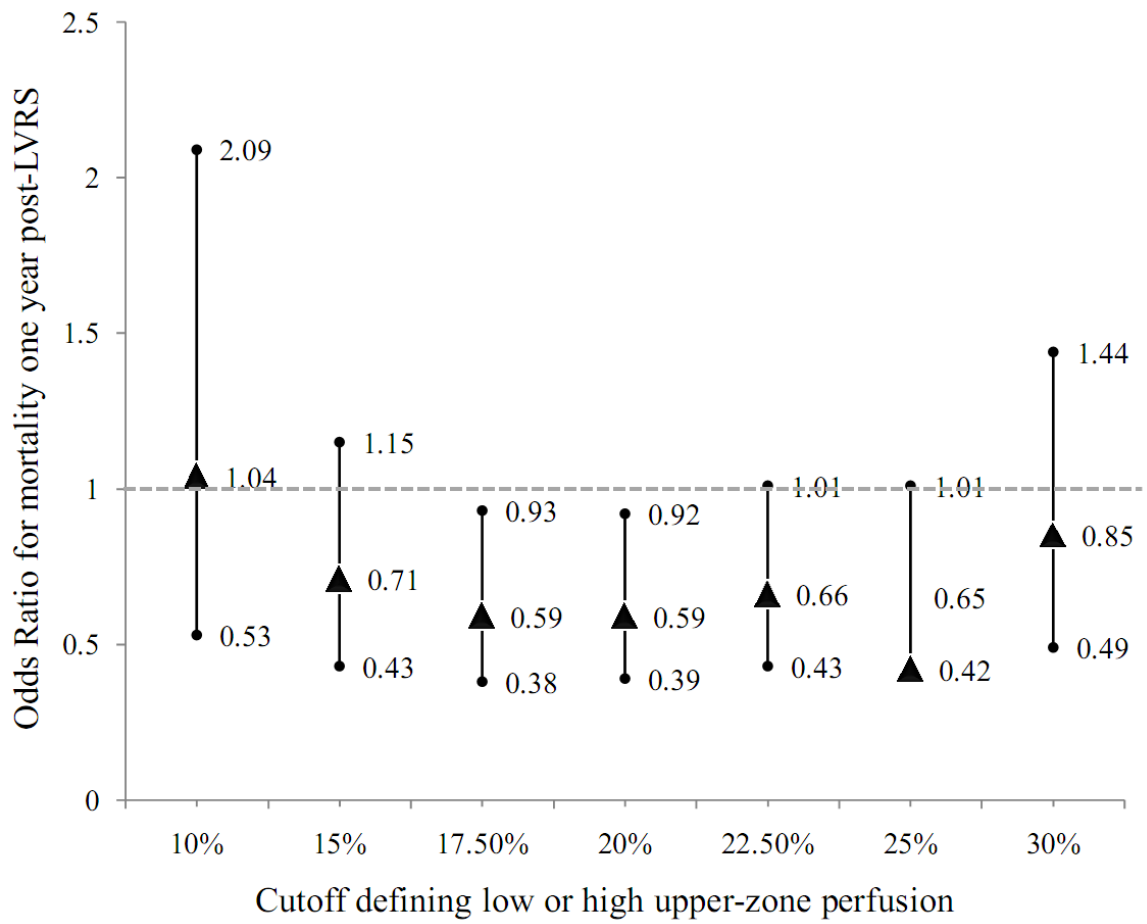

2

3

4
